# Supplementary material for: Preliminary Study on the Effect and Molecular Mechanism of Tetrandrine in Alleviating Pulmonary Inflammation and Fibrosis Induced by Silicon Dioxide
Source: MDPI journal article supplement (doi:10.3390/toxics11090765), 2023-09-09
Supplement: s1 [file s1]

## Supplementary Materials

**Table S1.** Detailed information about the kits and antibodies used in this study.

| Kits / Antibodies                                                       | Manufacturers                                            | Cat No.  | Application (dilution ratio) |
|-------------------------------------------------------------------------|----------------------------------------------------------|----------|------------------------------|
| RNAsimple Total RNA Kit                                                 |                                                          | DP419    | -                            |
| FastKing gDNA Dispelling RT SuperMix Kit                                | TIANGEN Biotech (Beijing) Co., Ltd., China               | KR118    | -                            |
| RealUniversal Color PreMix (SYBR Green) Kit                             |                                                          | FP205    | -                            |
| Hydroxyproline (HYP) Content Assay Kit                                  | Beijing Solarbio Science & Technology Co., Ltd., China   | BC0255   | -                            |
| Rabbit polyclonal anti-Collagen I (Col-I) antibody                      |                                                          | AF7001   | IHC (1:200)                  |
| Rabbit polyclonal anti-Fibronectin (Fn) antibody                        | Affinity Biosciences (Jiangsu), China                    | AF5335   | IHC (1:200)                  |
| Rabbit monoclonal anti-LC3B antibody                                    | Abcam                                                    | AB192890 | WB (1:4000)                  |
| Rabbit monoclonal anti-p62/SQSTM1 Antibody                              | Abmart Inc. China                                        | T55546   | WB (1:5000)                  |
| Rabbit polyclonal anti-ATG7 antibody                                    |                                                          | DF6130   | IF (1:200)                   |
| Rabbit polyclonal anti-LC3B antibody                                    |                                                          | AF4650   | IF (1:200)                   |
| Rabbit polyclonal anti-SQSTM1/P62 antibody                              |                                                          | AF5384   | IF (1:200)                   |
| Rabbit polyclonal anti- $\beta$ -actin antibody                         |                                                          | AF7018   | WB (1:5000)                  |
| Rabbit polyclonal anti-LAMP1 antibody                                   | Affinity Biosciences (Jiangsu), China                    | DF4806   | WB (1:1000)                  |
| Rabbit polyclonal anti-CTSB antibody                                    |                                                          | AF5189   | WB (1:500)                   |
| Rabbit polyclonal anti-Bax antibody                                     |                                                          | AF0120   | WB (1:1000)                  |
| Rabbit polyclonal anti-Bcl2 antibody                                    |                                                          | AF6139   | WB (1:1000)                  |
| Rhodamine-labeled goat anti-rat IgG (H+L) (affinity purified)           |                                                          | ZF-0318  | IF (1:100)                   |
| Alexa Fluor® 488-labeled goat anti-rabbit IgG (H+L) (affinity purified) | Beijing Zhongshan Jinqiao Biotechnology Co., Ltd., China | ZF-0511  | IF (1:400)                   |
| Rabbit Two-Step Assay Kit (Rabbit Enhanced Polymer Assay System)        |                                                          | PV-9001  | IHC                          |
| Horseradish peroxidase-labeled goat anti-rabbit IgG (H + L)             | Affinity Biosciences (Jiangsu), China                    | S0001    | WB (1:5000)                  |

**Table S2.** Primer sequence information used in this study.

| <b>Gene</b>                    | <b>GenBank Accession No.</b> | <b>Forward primer (5'-3')</b>                      | <b>Reverse primer (5'-3')</b> | <b>Fragment Length</b> |
|--------------------------------|------------------------------|----------------------------------------------------|-------------------------------|------------------------|
| <i>GAPDH</i>                   | NM_001411843                 | GTATTGGGCGCCTGGTCACC                               | CGCTCCTGGAAGATGGTGATGG        | 202                    |
| <i>TNF-<math>\alpha</math></i> | NM_001278601                 | GCTGAGCTCAAACCCTGGTA                               | CGGACTCCGCAAAGTCTAAG          | 118                    |
| <i>IL-1<math>\beta</math></i>  | NM_008361                    | GCCTCGTGCTGTCGGACCCATAT                            | TCCTTTGAGGCCCAAGGCCACA        | 143                    |
| <i>MCP-1</i>                   | NM_011333                    | TTGACCCGTAAATCTGAAGCTAATTCACAGTCCGAGTCACACTAGTTCAC |                               | 110                    |
| <i>TGF-<math>\beta</math>1</i> | NM_011577                    | CCACCTGCAAGACCATCGAC                               | CTGGCGAGCCTTAGTTTGGAC         | 91                     |
| <i>Col-I</i>                   | NM_007742                    | TAGGCCATTGTGTATGCAGC                               | ACATGTTTCTGCTTTGTGGACC        | 110                    |
| <i>Fn</i>                      | NM_001276413                 | CTGACTGGCCTTACCAGAGG                               | GTTGTCATGGCACCATTTCAG         | 288                    |
| <i>ATG7</i>                    | NM_001379130                 | TGCCAGAGGATTCAACAT                                 | CATCAATAGGAAGACGACATC         | 139                    |
| <i>LC3B</i>                    | NM_026160                    | TTATAGAGCGATACAAGGGGGAG                            | CGCCGTCTGATTATCTTGATGAG       | 109                    |
| <i>P62</i>                     | NM_011018                    | AGGATGGGGACTTGGTTGC                                | TCACAGATCACATTGGGGTGC         | 178                    |
